# Supplementary material
Source: PubMed Central journal article supplement (PMC3077925)
Supplement: NIHMS266937-supplement-1.pdf [file NIHMS266937-supplement-1.pdf]

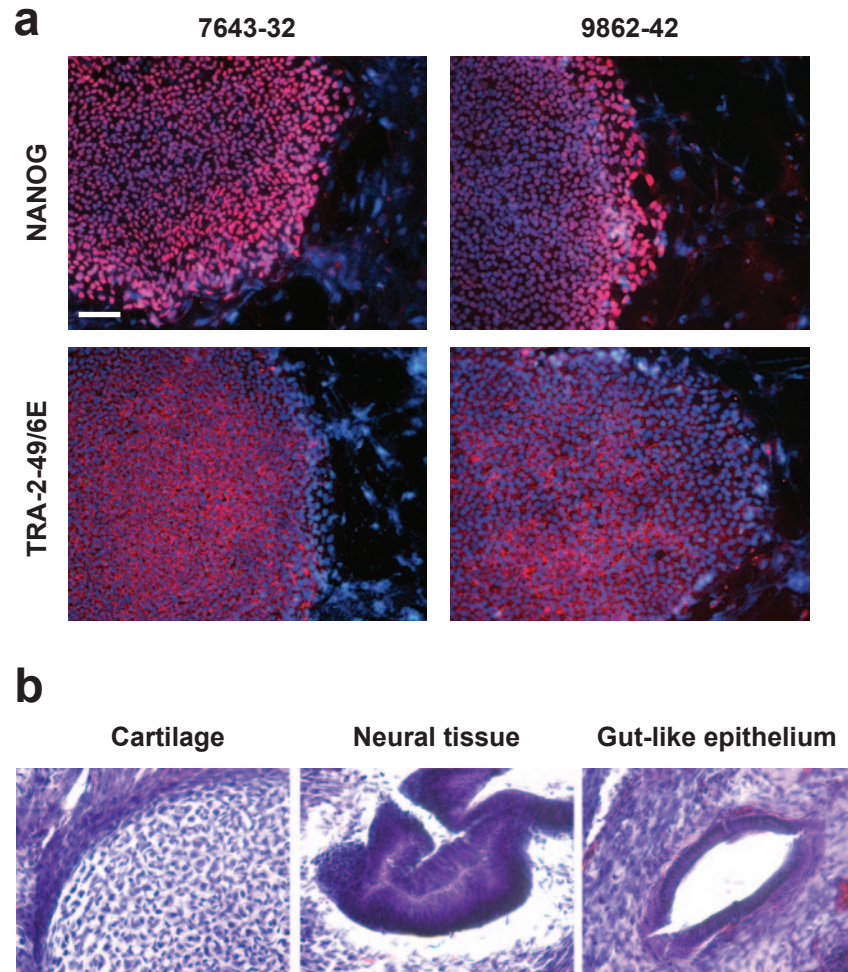

**Supplementary Figure 2. iPSC immunocytochemistry and teratoma formation assay**

a) Immunocytochemistry of iPSCs generated from two patients (clone, 7643-32 and 9862-42) using antibodies that recognize the pluripotency markers, NANOG (top, red) and TRA-2-49/6E (bottom, red). Hoechst staining (blue) indicates the nuclei. Scale bar is 50  $\mu$ m. b) Sections of a teratoma formed by TS iPSCs (clone, 7643-7) stained with hematoxylin and eosin. Tissue derived from the three germ layers such as cartilage (left, mesoderm), neural tissue (middle, ectoderm) and gut-like epithelium (right, endoderm) could be detected and were observed in all control and TS iPSCs (Supplementary Table1).

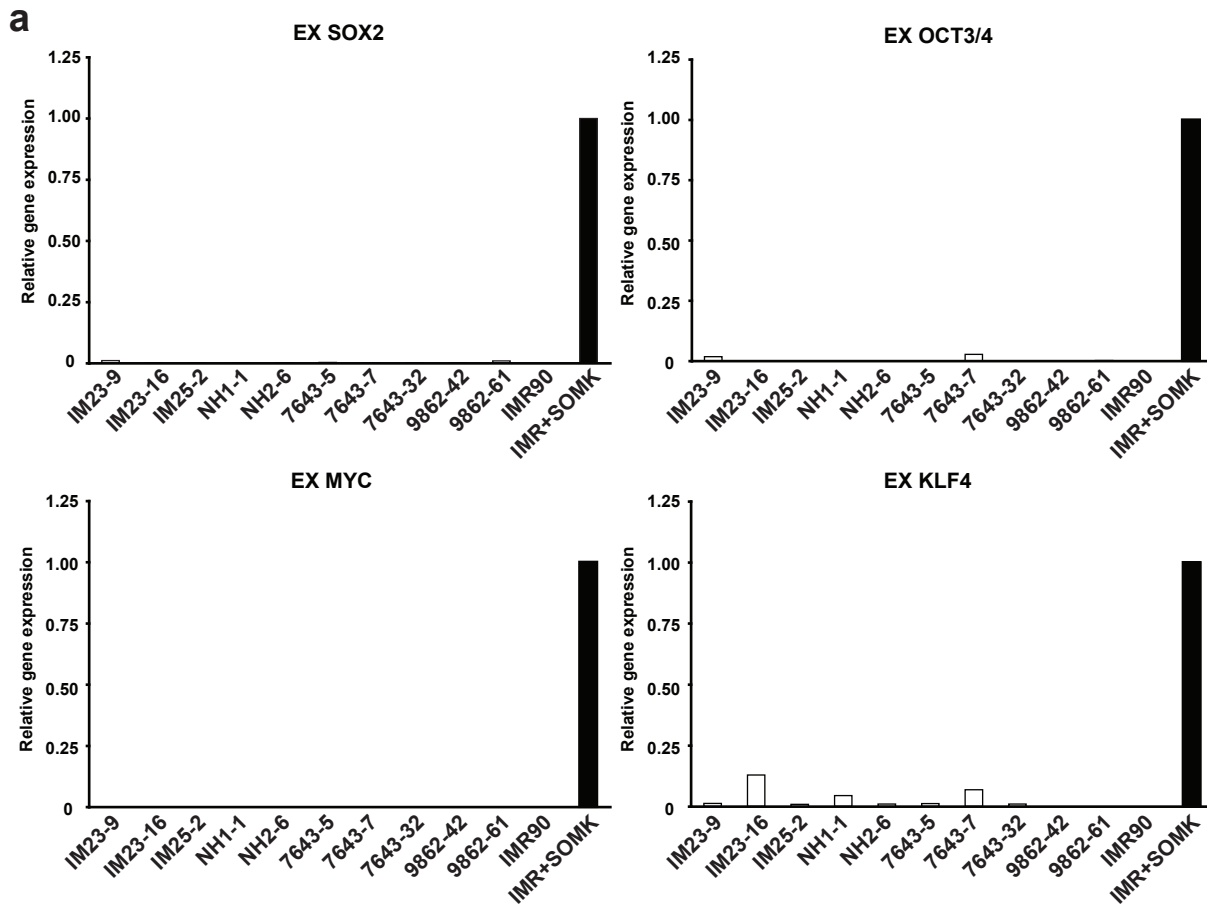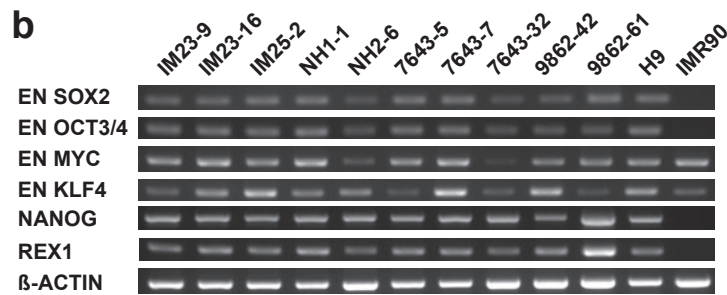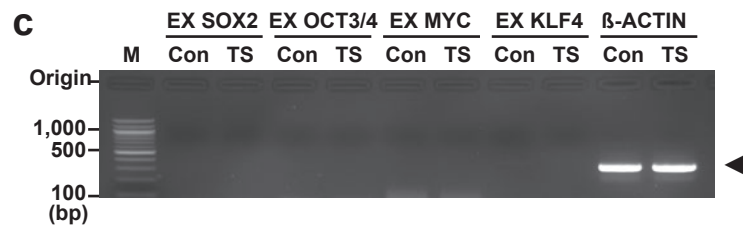

**Supplementary Figure 3. Gene expression profiling of iPSCs** a) Quantitative RT-PCR analysis of the expression of reprogramming genes in TS and control iPSC lines. IMR90 are human fibroblasts that were used as a control. IMR+SOMK are IMR90 cells infected with the four retroviruses (SOX2, OCT3/4, C-MYC and KLF4) used for reprogramming. The expression of exogenous (EX) genes was normalized relative to GAPDH. b) Semi-quantitative RT-PCR analysis of endogenous (EN) gene expression in the iPSC lines used in the study. The expression of endogenous (EN) SOX2, OCT3/4, C-MYC and KLF4 was examined as well as the pluripotent markers NANOG and REX1 and house keeping gene  $\beta$ -ACTIN (see Supplementary Table 2 for primer sequences). Human embryonic stem cell line H9 and human fibroblasts IMR90 were used as control samples. c) Conventional RT-PCR was used to examine if the reprogramming genes were active in cardiac cells generated from control (NH1-1) and TS iPSC lines (7643-5) at d37.

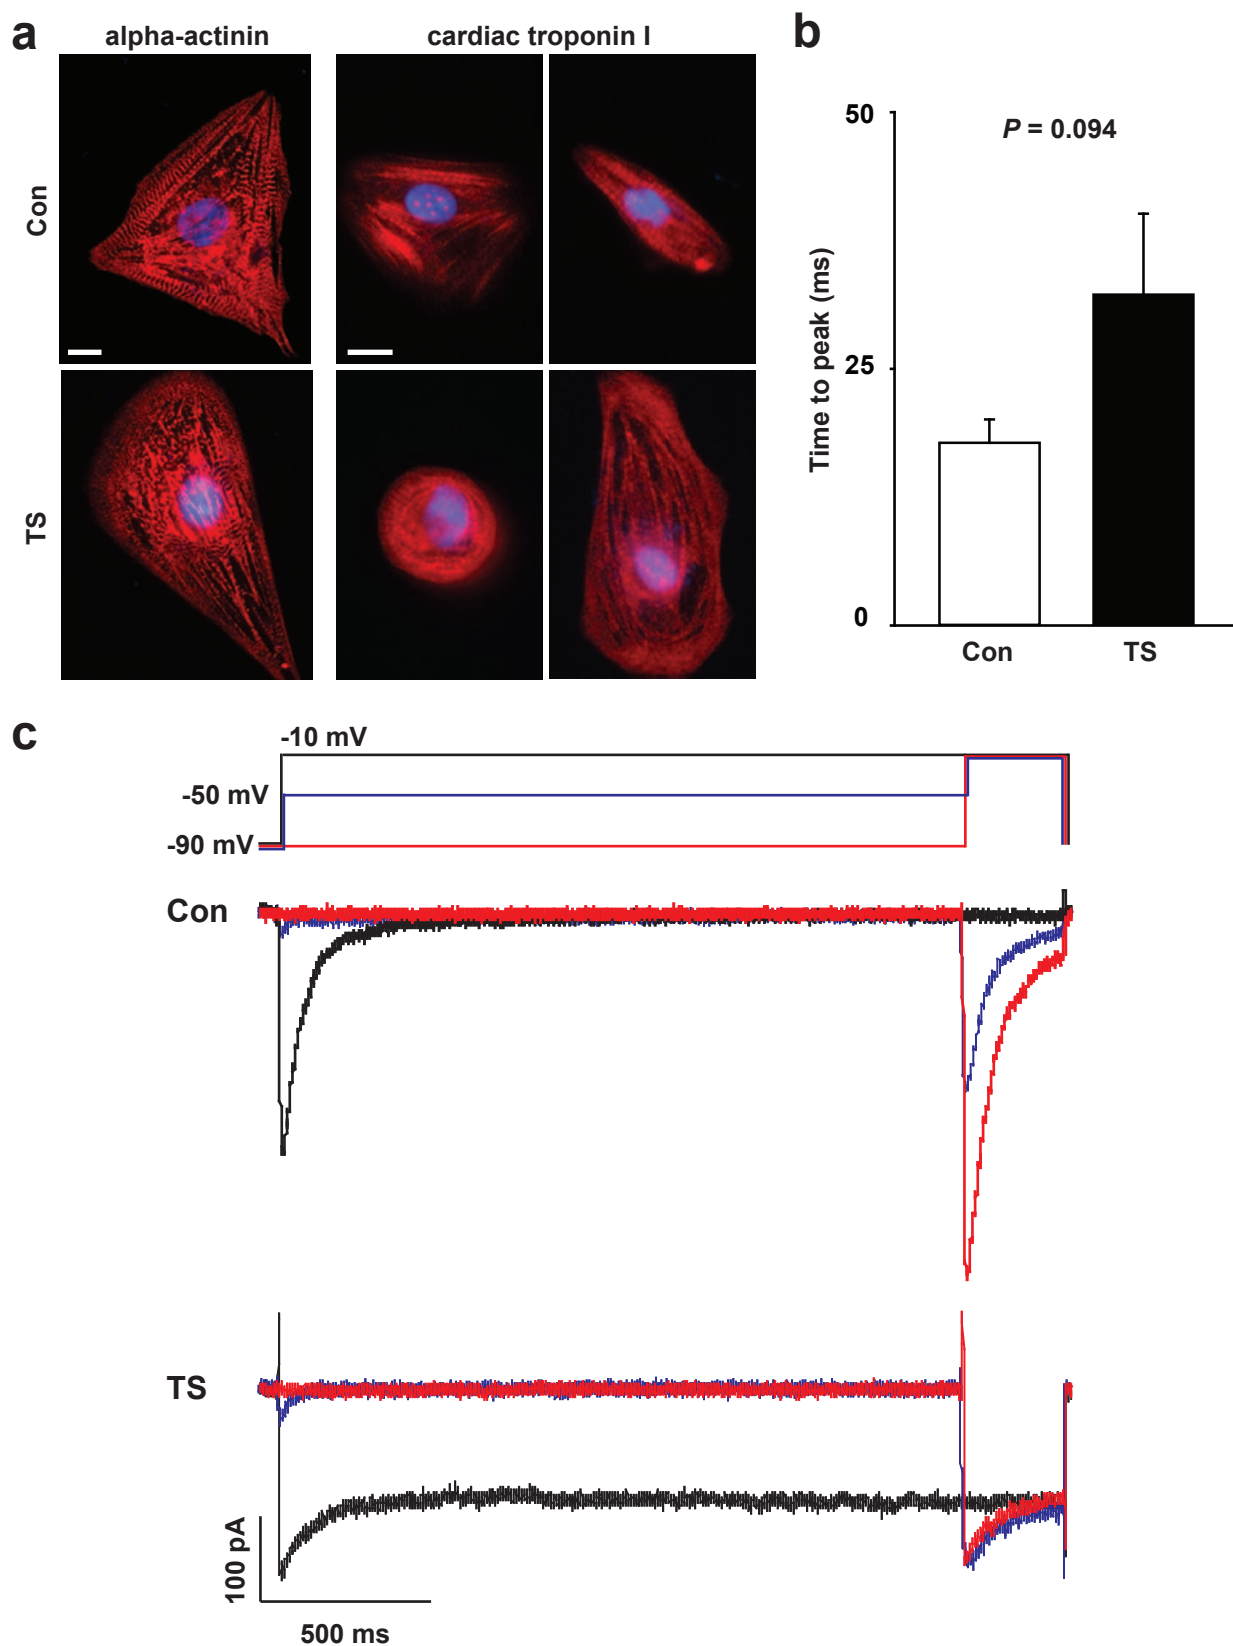

**Supplementary Figure 4. Immunocytochemistry and electrophysiology of TS and control cardiomyocytes**

a) Staining of human cardiomyocytes generated from control (top, NH1-1 and NH2-6) and TS iPSCs (bottom, 7643-5 and 7643-32) using antibodies against  $\alpha$ -Actinin (left, see Fig 2a) and cardiac Troponin I (right). Scale bar, 10  $\mu$ m. b) Time to the peak of the Ba<sup>2+</sup> current in TS and control CMs stimulated with a depolarizing pulse to -10 mV (see Fig 2b, control,  $n=23$  cells in 4 lines; TS,  $n=19$  in 4 lines, mean  $\pm$  s.e.m, students T test). TS channels activate more slowly than WT channels. c) Representative traces of Ba<sup>2+</sup> currents in TS and control CMs stimulated with a prepulse to -90, -50 and -10, red, blue and black traces respectively, and a test pulse to -10 mV. This pulse protocol was used to measure residual current in Fig 2e.

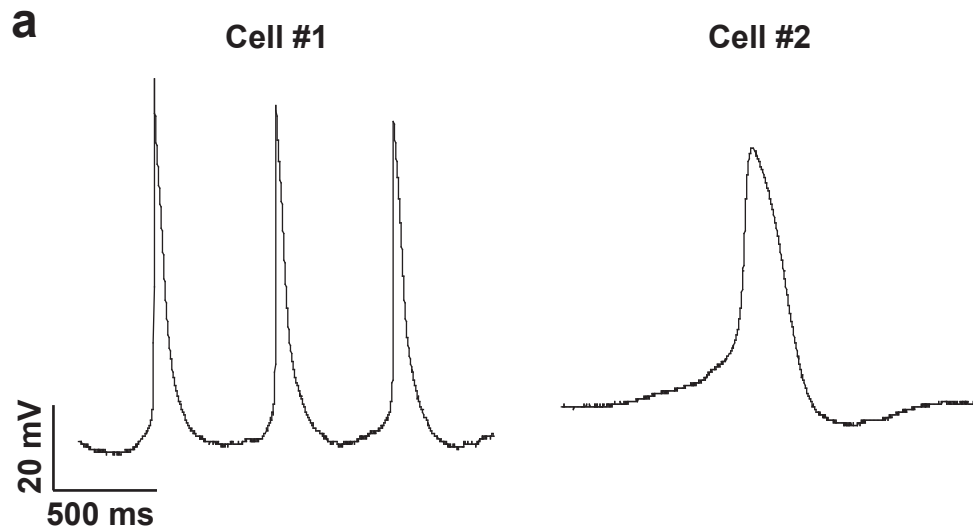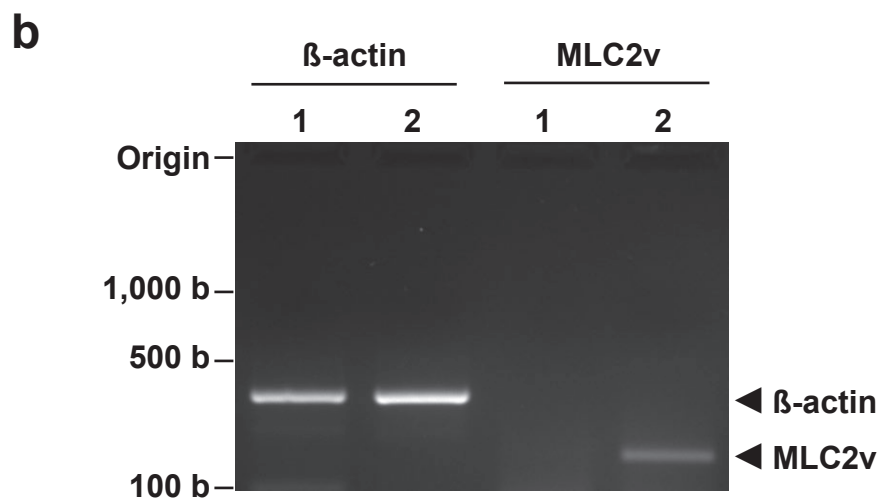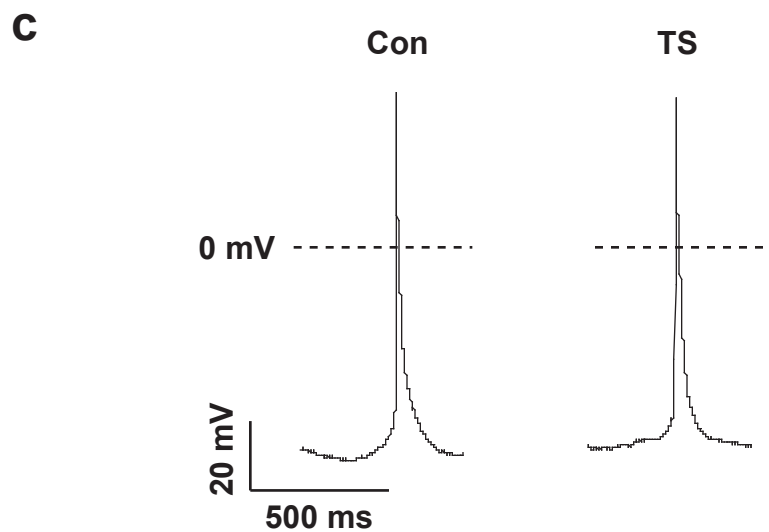

**Supplementary Figure 5. Patch clamp recordings and single-cell RT-PCR of atrial and ventricular cells derived from control and TS patients** a) Action potential recording of iPSC-derived atrial and ventricular cardiomyocytes. b) Agarose gel electrophoresis of single cell RT-PCR products showing expression of the ventricular marker MLC2v in cell #2 but not in cell #1. β-actin was expressed in both cells. c) Recording of action potentials in atrial cells from control (left) and TS (right) CMs did not reveal any significant differences.

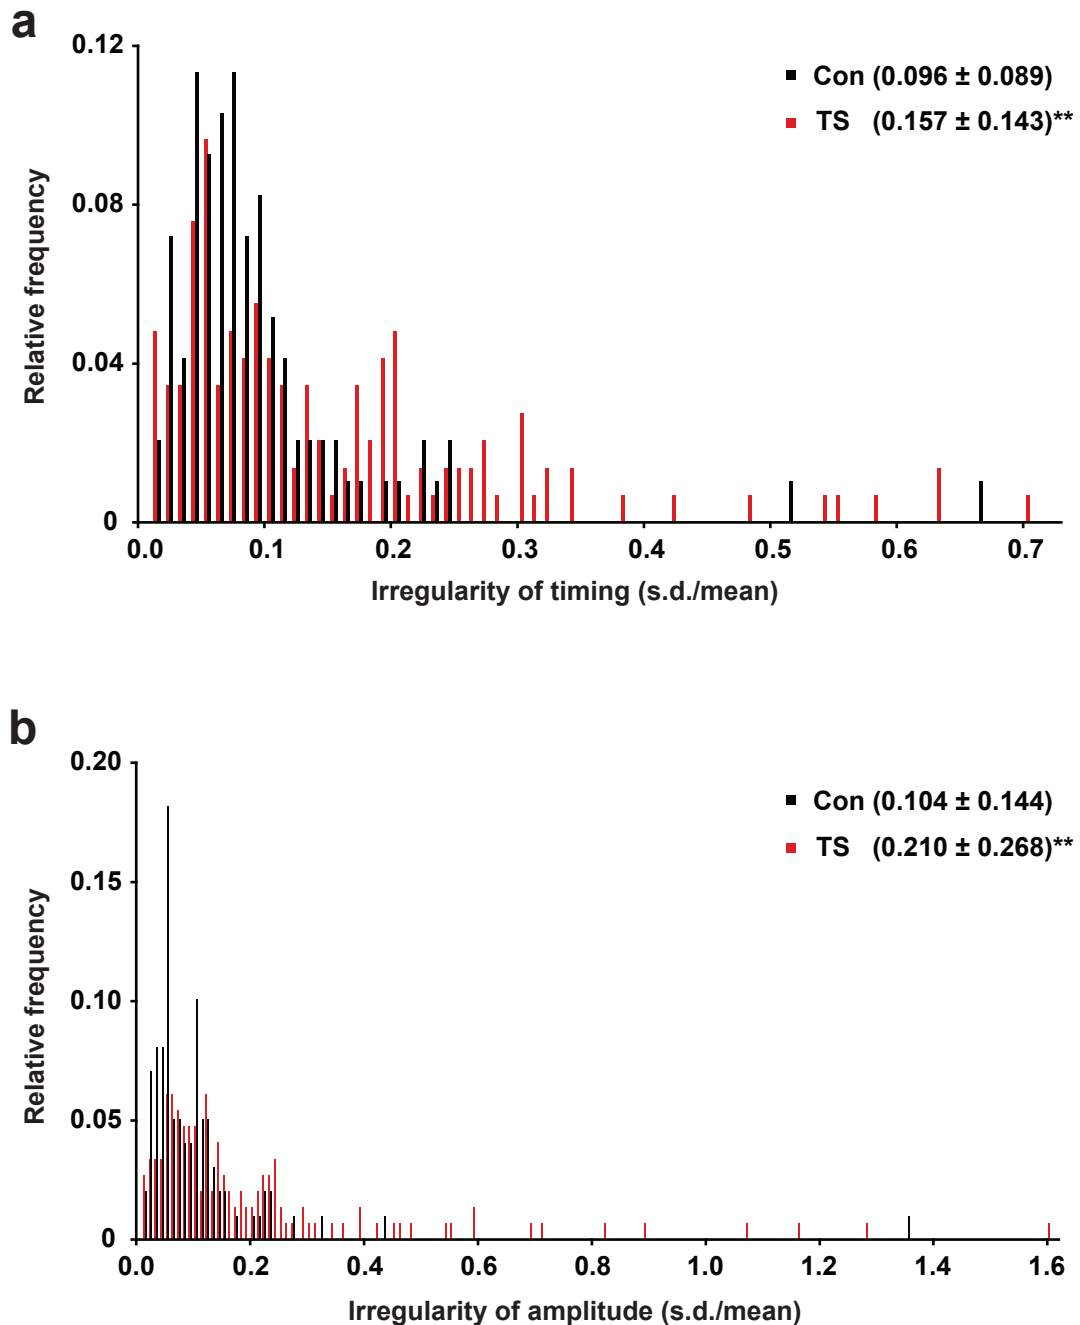

**Supplementary Figure 6. Irregularity of spontaneous Ca<sup>2+</sup> transients in TS cardiomyocytes** Histogram showing the proportion of cells with Ca<sup>2+</sup> transients of irregular frequency (a) or amplitude (b). The regularity of the contractions was calculated by dividing the standard deviation of the oscillation period by the mean of the period or by standard deviation of the amplitude by the mean of the amplitude. TS CMs were significantly more likely to have contractions with irregular frequencies and amplitudes than the controls (control,  $n=102$  cells in 4 lines; TS,  $n=149$  in 4 lines, mean  $\pm$  s.d. \*\* $P<0.01$ , Students T-test).

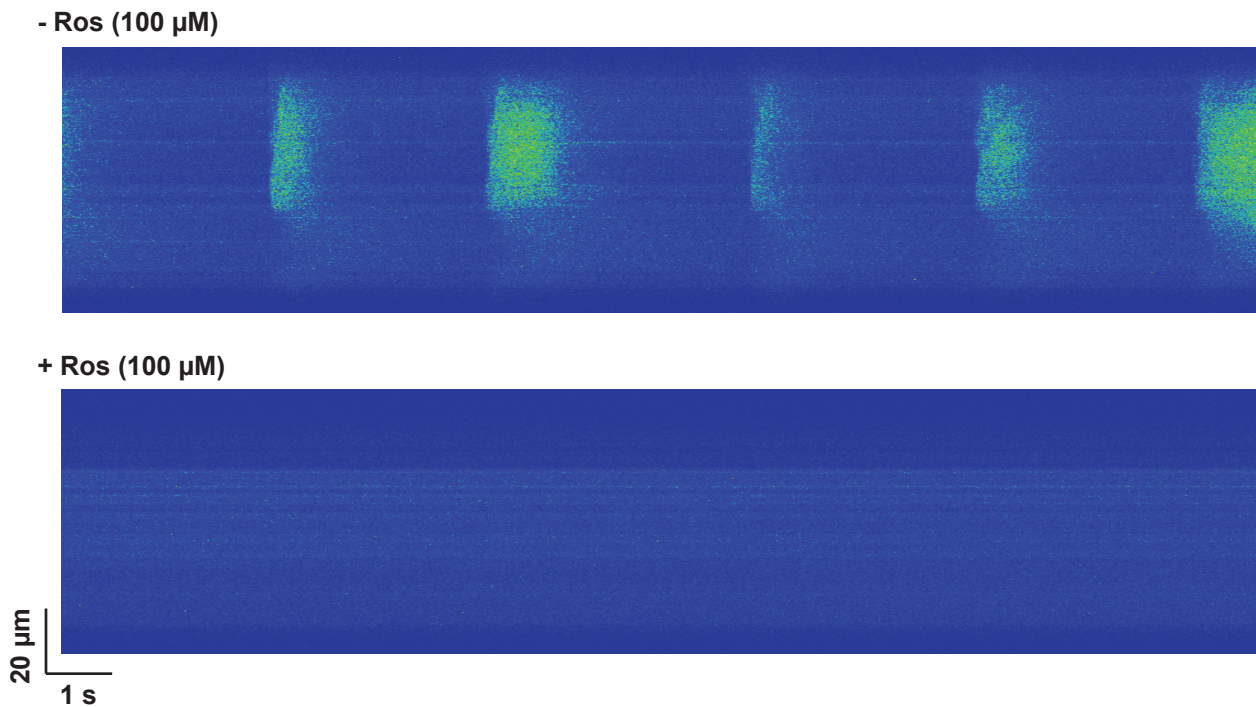

**Supplementary Figure 7. Optimization of the concentration of roscovitine in TS cardiomyocytes**

Line-scan images of spontaneous  $\text{Ca}^{2+}$  transients from TS CMs showing the irregular timing and amplitude of the  $\text{Ca}^{2+}$  transients (upper panel). Addition of 100  $\mu$ M Ros eliminated spontaneous contractions and  $\text{Ca}^{2+}$  transients (lower panel,  $n=3$  cells, 1 lines). A lower concentration of Ros (10  $\mu$ M) didn't have significant effect on irregularity of spontaneous  $\text{Ca}^{2+}$  transients in TS CMs (data not shown).

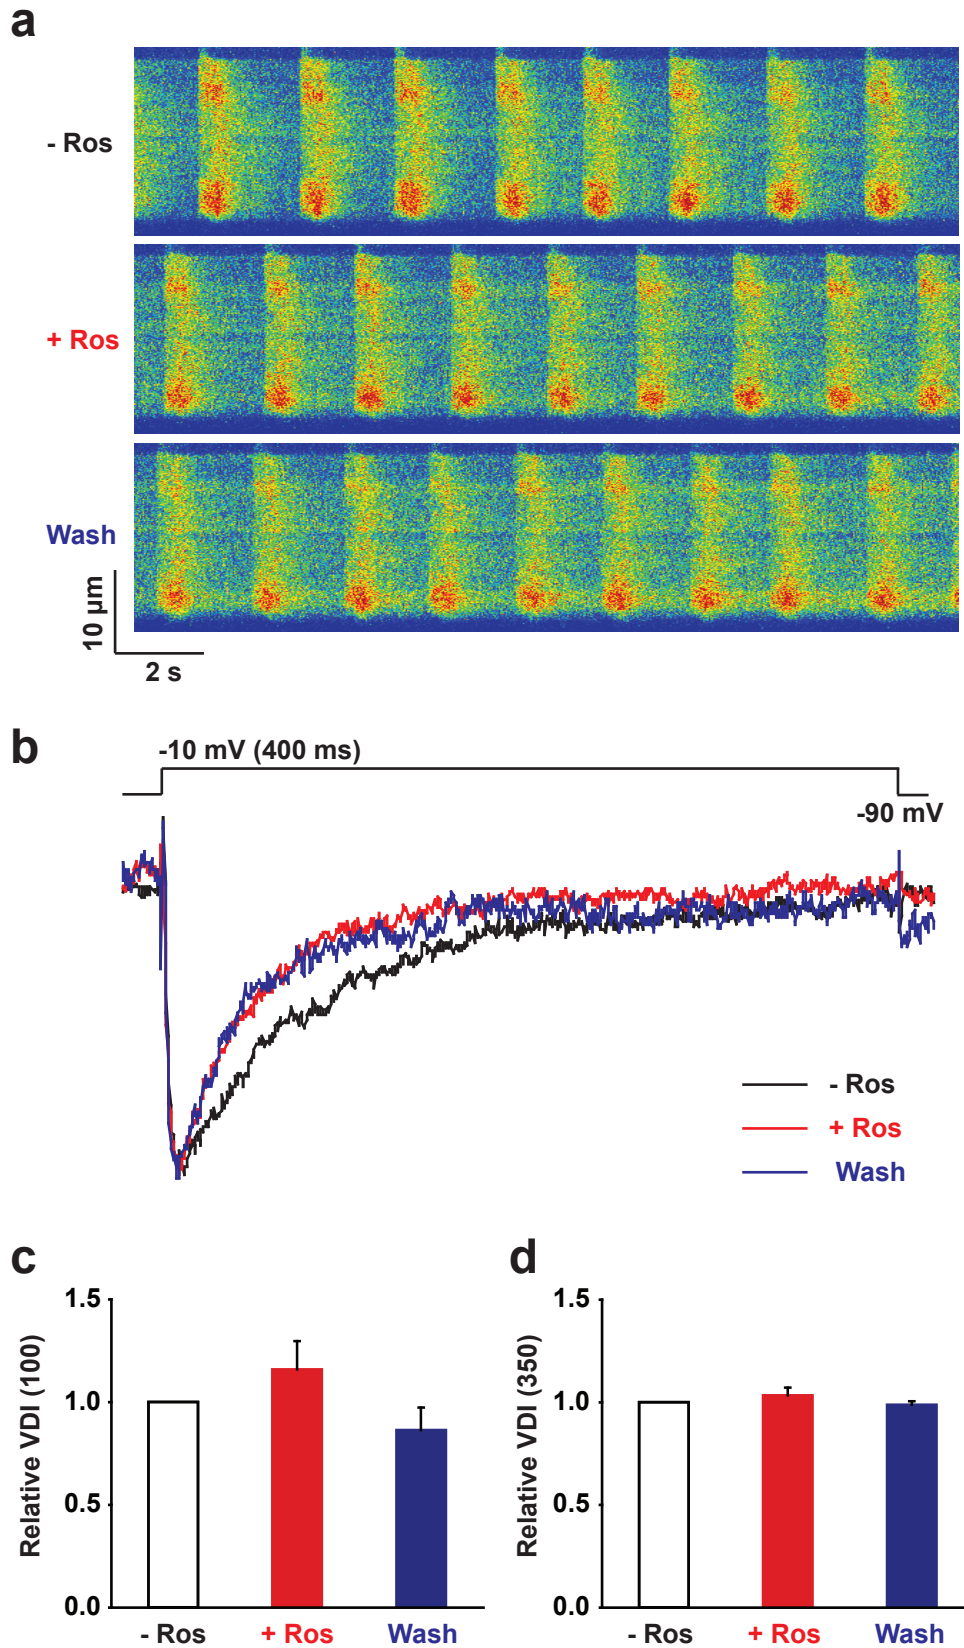

**Supplementary Figure 8. Effects of Roscovitin on control CMs** a) Line-scan images of spontaneous  $\text{Ca}^{2+}$  transients in control CMs showing the regular timing and amplitude of the  $\text{Ca}^{2+}$  transients.  $33.3 \mu\text{M}$  Ros had no effect on the spontaneous  $\text{Ca}^{2+}$  transients ( $n=10$  cells in 1 line). b) Traces of  $\text{Ba}^{2+}$  current in control CMs show normal inactivation kinetics and no significant effect of Ros on VDI at 100 ms (c) or at 350 ms (d) ( $n=5$  cells in 1 line).



**Supplementary Table 1 Characterization of control and TS iPSC lines used for *in vitro* differentiation**

| line              | Putative viral integration site               |                                                |                                                  |                                                    | Immunocytochemistry |             | Teratoma formation assay | Karyotype       |
|-------------------|-----------------------------------------------|------------------------------------------------|--------------------------------------------------|----------------------------------------------------|---------------------|-------------|--------------------------|-----------------|
|                   | SOX2                                          | OCT3/4                                         | KLF4                                             | C-MYC                                              | NANOG               | TRA-2-49/6E |                          |                 |
| <b>IM23-9</b>     | chr22q11.2 (25087178-)                        | chr7p11.2 (55196937-)                          | chr22q12.1 (28943374-)                           | chr10p11.21 (21981935-)                            | +                   | +           | +                        | +               |
| <b>IM23-16</b>    | chr11q13.4 (71990848-)                        | chr7q33 (137673483+)<br>chr16q23.2 (82100840-) | chr3q21.3 (128944884-)                           | chr1p13.3 (1093736535+)<br>chr20q13.13 (48788953-) | +                   | +           | +                        | +               |
| <b>IM25-2</b>     | chr1p31 (77790178+)                           | chr11q13.4 (71880060-)                         | chr3p12.3 (79079948-)<br>chr17q21.31 (42624647-) | chr7p14.1 (42379186+)                              | +                   | +           | +                        | ND <sup>2</sup> |
| <b>NH1-1</b>      | chr1q42.1-43 (234747067-)                     | chr10q21.2 (63841589-)                         | chr3q27.1 (183414900-)                           | chr5q33.1 (150532700+)                             | +                   | +           | +                        | +               |
| <b>NH2-6</b>      | chr11p15.4 (2912871-)                         | chr15q15.1 (41047296-)                         | chr1q25.3 (181103951+)<br>chr4q22.1 (89884470-)  | chr3p22.3 (34048914-)<br>chr10q26.13 (124051763+)  | +                   | +           | +                        | +               |
| <b>7643-5</b>     | chr12p13.31 (8185310-)                        | chr4q28.1 (125861955-)                         | chr11p15.4 (8703661+)                            | chr11q13.4 (73024636+)                             | +                   | +           | +                        | +               |
| <b>7643-7</b>     | chr2q35 (219421964+)                          | ch2q32.2 (196978607+)<br>chr13q34 (111012751-) | chr12p13.31 (6446368+)                           | chr12q13.3 (57850623-)                             | +                   | +           | +                        | +               |
| <b>TS 7643-32</b> | chr1q32.1 (204385326-)<br>chr9q32(117657021-) | chr10p12.2 (23727624+)                         | ND <sup>1</sup>                                  | chr1p32.1 (60501593-)<br>chr7q32.3 (131286774+)    | +                   | +           | +                        | +               |
| <b>9862-42</b>    | chr7q31.1 (107670711+)                        | chr6q22.1 (117828633-)                         | chr2q31.1 (176979044+)                           | chr1p34.3 (36912928)<br>chr20p13 (3868985+)        | +                   | +           | +                        | +               |
| <b>9862-61</b>    | chr1p34.3 (36817536-)                         | chr12q13.13 (52213638-)                        | chr8p23.2 (5024317+)                             | chr5q35.1 (172226554-)                             | +                   | +           | +                        | +               |

ND<sup>1</sup>, not determined because reliable PCR products were not obtained; ND<sup>2</sup>, not determined yet

**Supplementary Table 2. Primer Sequences**

| Primer              | Sequence (5' to 3')            | Applications                     |
|---------------------|--------------------------------|----------------------------------|
| pMXs-AS3200         | TTATCGTCGACCACTGTGCTGCTG       | RT-PCR, exogenous genes in iPSCs |
| Nanog-S968          | CAGCCCCGATTCTTCCACCAGTCCC      | RT-PCR, endogenous Nanog         |
| Nanog-AS1334        | CGGAAGATTCCCAGTCGGGTTCAACC     | RT-PCR, endogenous Nanog         |
| Rex1-F              | CAGATCCTAAACAGCTCGCAGAAT       | RT-PCR, endogenous Rex1          |
| Rex1-R              | GCGTACGCAAATTAAGTCCAGA         | RT-PCR, endogenous Rex1          |
| Sox2-S1430          | GGGAAATGGGAGGGGTGCAAAAGAGG     | RT-PCR, endogenous Sox2          |
| Sox2-AS1555         | TTGCGTGAGTGTGGATGGGATTGGTG     | RT-PCR, endogenous Sox2          |
| Sox2-S691           | GGCACCCCTGGCATGGCTCTTGGCTC     | RT-PCR, exogenous Sox2           |
| Oct3/4-S1165        | GACAGGGGGAGGGGAGGAGCTAGG       | RT-PCR, endogenous Oct3/4        |
| Oct3/4-AS1283       | CTTCCCTCCAACCAGTTGCCCAAAC      | RT-PCR, endogenous Oct3/4        |
| Oct3/4-S944         | CCCCAGGGCCCCATTTTGGTACC        | RT-PCR, exogenous Oct3/4         |
| Myc-S253            | GCGTCCTGGGAAGGGAGATCCGGAGC     | RT-PCR, endogenous Myc           |
| Myc-AS555           | TTGAGGGGCATCGTCGCGGGAGGCTG     | RT-PCR, endogenous Myc           |
| Myc-S1011           | CAACAACCGAAAATGCACCAGCCCCAG    | RT-PCR, exogenous Myc            |
| Klf4-S1229-MY       | CCCACACAGGTGAGAAACCTTACC       | RT-PCR, endo/exogenous Klf4      |
| Klf4-AS-MY          | GTAGTGCTTTCTGGCTGGGCTC         | RT-PCR, endogenous Klf4          |
| pMXs-F1             | CCTGAAATGACCCTGTGCCTTATTTG     | nested PCR for viral integration |
| pMXs-F2             | GTATCCAATAAACCCCTCTTGCAAGTGC   | nested PCR for viral integration |
| Sox2-R1             | AGTGGGAGGAAGAGGTAACCAC         | nested PCR for viral integration |
| Sox2-R2             | CTGCGAGTAGGACATGCTGTAG         | nested PCR for viral integration |
| Oct3/4-R1           | CTCGAGCCCAAGCTGCTGG            | nested PCR for viral integration |
| Oct3/4-R2           | CGATGTGGCTGATCTGCTGCAG         | nested PCR for viral integration |
| Myc-R1              | CTTCTTGTTCTCCTCAGAGTCGC        | nested PCR for viral integration |
| Myc-R2              | AGTCTTGCGAGGCGCAGGACTT         | nested PCR for viral integration |
| Klf4-R1             | CGGAATGTACACCGGGTCCAATTC       | nested PCR for viral integration |
| Klf4-R2             | GGACTCCCTGCCATAGAGGAG          | nested PCR for viral integration |
| $\beta$ -Actin-F    | GCTCGTCGTCGACAACGGCTC          | RT-PCR in iPSCs & cardiomyocytes |
| $\beta$ -Actin-R    | CAAACATGATCTGGGTCATCTTCTC      | RT-PCR in iPSCs & cardiomyocytes |
| $\beta$ -MHC-F      | GACGGAGGAGGACAGGAAAAACCTGC     | RT-PCR in cardiomyocytes         |
| $\beta$ -MHC-R      | CAAAGCTACTCCTCATTCAAGCCCTTCGTG | RT-PCR in cardiomyocytes         |
| ANP-F2              | GAACCAGAGGGGAGAGACAGAGCAGC     | RT-PCR in cardiomyocytes         |
| ANP-R2              | CCCTCAGCTTGCTTTTTAGGAGGGCAGATC | RT-PCR in cardiomyocytes         |
| Cav1.2-exon7-F1-MY  | GTTCCAGCAGAAGATGACCCTTCCCC     | RT-PCR in cardiomyocytes         |
| Cav1.2-exon8-R1-MY  | GGGTAACCTCATAGCCCATAGCGTCCTGC  | RT-PCR in cardiomyocytes         |
| Cav1.2-exon8a-F1-MY | GTCAATGATGCCGTAGGAAGGGACTGG    | RT-PCR in cardiomyocytes         |
| Cav1.2-exon9-R1-MY  | GTTTCGGGGCTTCTCCTCATCCATGCC    | RT-PCR in cardiomyocytes         |
| MLC2v-F             | CATGGACCAGAACAGGGATGGCTTCATTG  | RT-PCR in cardiomyocytes         |
| MLC2v-R             | CCTCAGGGTCCGCTCCCTTAAGTTTC     | RT-PCR in cardiomyocytes         |
